# Supplementary material for: Use of Ceftaroline Fosamil in Osteomyelitis: CAPTURE Study Experience
Source: PubMed Central journal article supplement (PMC6385445; doi:10.1186/s12879-019-3791-z), 2019-02-21
Supplement: 12879_2019_3791_MOESM1_ESM.pdf [file 12879_2019_3791_MOESM1_ESM.pdf]

**Supplementary Table 1. Site numbers and Institutional Review Board Names and Addresses**

| <b>Site Number</b> | <b>Institutional Review Board Names</b>                                                                                        |
|--------------------|--------------------------------------------------------------------------------------------------------------------------------|
| <b>101</b>         | Medical Center of Central Georgia Institutional Review Board<br>777 Hemlock Street<br>Macon, GA 31201                          |
| <b>102</b>         | Office of Bay Medical Institutional Review Board<br>615 No. Bonita Ave.<br>Panama City, FL 32401                               |
| <b>104</b>         | Promedica Health System Institutional Review Board<br>2142 N. Cove Blvd.<br>Toledo, OH 43606                                   |
| <b>105</b>         | Summa Health System, Office of Research Administration<br>525 East Market Street, Suite G-1<br>Akron, OH, 44304                |
| <b>106</b>         | Human Research Protections Program, McLaren Health Care Corporation<br>1198 N. Belsay Road<br>Building #1,<br>Burton, MI 48509 |
| <b>107</b>         | Christus Spohn Health System Institutional Review Board<br>919 Hidden Ridge<br>Irving Texas, 75038                             |
| <b>108</b>         | LRG Healthcare Institutional Review Board<br>80 Highland Street<br>Laconia, NH 03246                                           |
| <b>109</b>         | Eastern Idaho Regional Medical Center Institutional Review Board<br>3100 Channing Way<br>Idaho Falls, ID 83404                 |
| <b>113</b>         | Covenant Health System Institutional Review Board<br>3615 19th Street<br>Lubbock, TX 79410                                     |
| <b>127</b>         | Jamaica Hospital Medical Center Institutional Review Board<br>Van Wyck Expressway<br>Jamaica, NY 11418                         |
| <b>135</b>         | Quorum Review IRB<br>1601 Fifth Avenue<br>Suite 1000<br>Seattle, WA 98101                                                      |
| <b>148</b>         | South Texas Health System SPI Committee<br>1102 W. Trenton<br>Edinburg, TX 78539                                               |
| <b>163</b>         | University of Texas Health Science Center at Houston<br>6410 Fannin Street<br>Suite 1100<br>Houston, Texas 77030               |
| <b>183</b>         | Quorum Review IRB                                                                                                              |

|            |                                                                                                                                                                      |
|------------|----------------------------------------------------------------------------------------------------------------------------------------------------------------------|
|            | 1601 Fifth Avenue<br>Suite 1000<br>Seattle, WA 98101                                                                                                                 |
| <b>208</b> | Blount Memorial Hospital Investigational Research and Review<br>Committee<br>907 E. Lamar Alexander Pkwy.<br>Maryville, TN 37804-5016                                |
| <b>239</b> | Sparrow Health System Institutional Review Board<br>Office of Research And Oversight Compliance<br>1215 E. Michigan Avenue<br>PO Box 30480<br>Lansing, MI 48090-7980 |
| <b>243</b> | Northern Arizona Healthcare Institutional Review Board<br>1200 North Beaver Street<br>Flagstaff, AZ 68001                                                            |
| <b>251</b> | Western Institutional Review Board<br>3535 7th Avenue SW<br>Olympia, WA 98502-5010                                                                                   |
| <b>290</b> | Maimonides Medical Center Institutional Review Board<br>4802 Tenth Avenue<br>Brooklyn, NY 11219                                                                      |
| <b>298</b> | Quorum Review IRB<br>1601 Fifth Avenue<br>Suite 1000<br>Seattle, WA 98101                                                                                            |
| <b>337</b> | Provena United Samaritans Medical Center Institutional Review<br>Committee<br>812 North Logan Avenue<br>Danville, IL 61832                                           |
| <b>343</b> | Sacred Heart Health System Institutional Review Board<br>5151 N. Ninth Avenue, PO Box 2700,<br>Pensacola, FL 32513                                                   |
| <b>350</b> | St. Vincent Research And Regulatory Affairs Department<br>8402 Harcourt Road, Suite 120<br>Indianapolis, IN 46260                                                    |
| <b>367</b> | Baptist Health South Florida Institutional Review Board<br>8900 North Kendall Drive<br>Miami, FL 33176-2197                                                          |
| <b>384</b> | Tufts Health Sciences Campus Institutional Review Board<br>800 Washington Street, Box 817<br>Boston, MA 02111                                                        |
| <b>400</b> | Quorum Review IRB<br>1601 Fifth Avenue<br>Suite 1000<br>Seattle, WA 98101                                                                                            |
| <b>412</b> | Georgetown University Institutional Review Board<br>3900 Reservoir Rd NW, MedDent SW104<br>Washington DC, 20007                                                      |
| <b>420</b> | Saint Michaels Medical Center Institutional Review Board<br>111 Central Avenue                                                                                       |

|            |                                                                                                                                                                                     |
|------------|-------------------------------------------------------------------------------------------------------------------------------------------------------------------------------------|
|            | Newark, NJ, 07102                                                                                                                                                                   |
| <b>429</b> | Partners Human Research Committee<br>116 Huntington Avenue, Suite 1002<br>Boston, MA 02116                                                                                          |
| <b>430</b> | Cape Fear Valley Health System Institutional Review Board<br>1638 Owen Drive<br>Fayetteville, NC 28304                                                                              |
| <b>436</b> | Mount Sinai Medical Center Institutional Review Board<br>4300 Alton Rd.<br>Miami Beach, FL 33140                                                                                    |
| <b>450</b> | Committee on Clinical Investigation Beth Israel Deaconess Medical Center<br>330 Brookline Avenue<br>Boston, MA 02215                                                                |
| <b>453</b> | Quorum Review IRB<br>1601 Fifth Avenue<br>Suite 1000<br>Seattle, WA 98101                                                                                                           |
| <b>457</b> | Quorum Review IRB<br>1601 Fifth Avenue<br>Suite 1000<br>Seattle, WA 98101                                                                                                           |
| <b>458</b> | Mercy Hospital St. Louis Institutional Review Board<br>621 S. New Ballas Road, Suite 6002-B<br>St. Louis, MO 63141                                                                  |
| <b>459</b> | Oregon Health & Science University Research Integrity Office<br>3181 SW Sam Jackson Park Road<br>Portland, OR 97239-3098                                                            |
| <b>460</b> | University of Kansas Medical Center, Human Research Protection Program<br>MS 1032<br>3901 Rainbow Blvd.<br>Kansas City, KS, 66160                                                   |
| <b>461</b> | Wayne State University Institutional Review Board<br>87 East Canfield, Second Floor<br>Detroit, MI 48201                                                                            |
| <b>467</b> | Christus Spohn Health System Institutional Review Board<br>919 Hidden Ridge<br>Irving Texas, 75038                                                                                  |
| <b>468</b> | Wayne State University Institutional Review Board<br>87 East Canfield, Second Floor<br>Detroit, MI 48201                                                                            |
| <b>471</b> | Quorum Review IRB<br>1601 Fifth Avenue<br>Suite 1000<br>Seattle, WA 98101                                                                                                           |
| <b>477</b> | Albert Einstein College of Medicine, Montefiore Medical Center, West<br>Campus Institutional Review Board<br>Montefiore Medical Center<br>3308 Rochambeau Avenue<br>Bronx, NY 10467 |
| <b>479</b> | Texas Health Resources Institutional Review Board                                                                                                                                   |

|            |                                                                                                                                                                     |
|------------|---------------------------------------------------------------------------------------------------------------------------------------------------------------------|
|            | 612 E. Lamar Blvd., Suite 1212<br>Arlington, TX 76011                                                                                                               |
| <b>501</b> | Mercer University Institutional Review Board<br>1550 College Street, MUSM-MHS Suite 2<br>Macon, GA 31207-0001                                                       |
| <b>525</b> | Hartford Healthcare Institutional Review Board<br>80 Seymour Street, P.O. Box 5037<br>Hartford, CT 06102-5037                                                       |
| <b>536</b> | Quorum Review IRB<br>1601 Fifth Avenue<br>Suite 1000<br>Seattle, WA 98101                                                                                           |
| <b>557</b> | Quorum Review IRB<br>1601 Fifth Avenue<br>Suite 1000<br>Seattle, WA 98101                                                                                           |
| <b>559</b> | Creighton University IRB<br>2500 California Plaza<br>Omaha, NE 68178                                                                                                |
| <b>562</b> | University of Cincinnati Institutional Review Board<br>2600 Clifton Ave.<br>Cincinnati, OH 45221                                                                    |
| <b>563</b> | St. John Hospital and Medical Center Institutional Review Board<br>19251 Mack Avenue, Suite 340<br>Gross Pointe Woods, MI 48236                                     |
| <b>589</b> | University of Missouri Adult Health Sciences Institutional Review Board<br>5319 Rockhill Road<br>Kansas City, MO 64108                                              |
| <b>627</b> | DeKalb Medical Institutional Review Board<br>2701 North Decatur Rd.<br>Decatur, GA 30033                                                                            |
| <b>662</b> | Henry Ford Health System Institutional Review Board<br>Research Administration<br>CFP Basement 046<br>2799 West Grand Boulevard<br>Detroit, MI 48202-2689           |
| <b>665</b> | Western Institutional Review Board<br>3535 7th Avenue SW<br>Olympia, WA 98502-5010                                                                                  |
| <b>667</b> | University of Tennessee Institutional Review Board<br>960 East Third Street, Suite 102<br>Chattanooga, TN 37403                                                     |
| <b>668</b> | Huntsville Hospital Institutional Review Board<br>101 Silvey Road, Huntsville, AL 35801                                                                             |
| <b>676</b> | University of Maryland, Baltimore Institutional Review Board<br>22 South Greene Street<br>University of Maryland Medical Center Room, S10D13<br>Baltimore, MD 21201 |
| <b>677</b> | University of Tennessee Health Science Center Institutional Review Board<br>910 Madison Avenue, Suite 600                                                           |

|            |                                                                                                                      |
|------------|----------------------------------------------------------------------------------------------------------------------|
|            | Memphis, TN 38163                                                                                                    |
| <b>678</b> | University of Utah Institutional Review Board<br>75 South 2000<br>East Salt Lake City, UT<br>84112                   |
| <b>700</b> | Columbia Memorial Hospital Institutional Review Board<br>71 Prospect Avenue<br>Hudson, NY 12534                      |
| <b>727</b> | Stanford University Institutional Review Board<br>Box 5579<br>Stanford, CA 94305                                     |
| <b>735</b> | Quorum Review IRB<br>1601 Fifth Avenue<br>Suite 1000<br>Seattle, WA 98101                                            |
| <b>738</b> | Quorum Review IRB<br>1601 Fifth Avenue<br>Suite 1000<br>Seattle, WA 98101                                            |
| <b>740</b> | St. Luke's Health System Institutional Review Board<br>190 East Bannock Street<br>Boise, ID 83712                    |
| <b>741</b> | Quorum Review IRB<br>1601 Fifth Avenue<br>Suite 1000<br>Seattle, WA 98101                                            |
| <b>745</b> | Chesapeake Institutional Review Board<br>7063 Columbia Gateway Drive, Suite 110<br>Columbia, MD 21046-3403           |
| <b>749</b> | Quorum Review IRB<br>1601 Fifth Avenue<br>Suite 1000<br>Seattle, WA 98101                                            |
| <b>753</b> | Quorum Review IRB<br>1601 Fifth Avenue<br>Suite 1000<br>Seattle, WA 98101                                            |
| <b>756</b> | University of Washington Institutional Review Board<br>4333 Brooklyn Avenue NE, Box 359470<br>Seattle, WA 98195-9470 |
